# Supplementary material for: Limited Performance of Estimated Total Kidney Volume for Follow-up of ADPKD
Source: PubMed Central journal article supplement — Kidney Int Rep. 2021 Aug 19;6(11):2821–9. doi: 10.1016/j.ekir.2021.08.013 (PMC8589695; doi:10.1016/j.ekir.2021.08.013), 2021-08-19
Supplement: mmc1.pdf [file mmc1.pdf]

## Supplementary Material

### Supplementary methods. Repeatability and reproducibility coefficients of mTKV and eTKV, and inter-technique reproducibility agreement determination

Repeatability coefficient was estimated as:

$$\text{Repeatability coefficient} = 1.96 \cdot \sqrt{2} \cdot wSD,$$

where  $wSD$  is the mean within-subject standard deviation, which is equal to the mean SD of paired differences from the first reading and second reading (of a given reader) divided by  $\sqrt{2}$  when only two measures are performed (ref 19). Similarly, reproducibility coefficient for mTKV and eTKV and inter-technique reproducibility agreement were computed respectively from the mean SD of paired differences from the first reader and second reader (for a given technique), and from the first technique and second technique (for a given reader). Note these coefficients may be derived directly from limits of agreement of Bland-Altman plots.

**Supplementary Table 1. Patient characteristics according to analysis performed**

|                                      | Total cohort<br>(n=140) | Patients with<br>repeatability and<br>reproducibility of<br>mTKV<br>(n=10) | Patients with<br>repeatability and<br>reproducibility of<br>eTKV<br>(n=22) | Patients with<br>agreement between<br>mTKV and eTKV in<br>junior reader<br>(n=53) |
|--------------------------------------|-------------------------|----------------------------------------------------------------------------|----------------------------------------------------------------------------|-----------------------------------------------------------------------------------|
| Age (years)                          | 45 ± 13                 | 44 ± 12                                                                    | 46 ± 12                                                                    | 46 ± 14                                                                           |
| Male gender (%)                      | 56 (40)                 | 4 (40)                                                                     | 10 (45)                                                                    | 21 (40)                                                                           |
| Body mass index (kg/m <sup>2</sup> ) | 26 ± 5                  | 26 ± 2                                                                     | 26 ± 4                                                                     | 26 ± 5                                                                            |
| eGFR (ml/min/1,73m <sup>2</sup> )    | 71 ± 31                 | 57 ± 33                                                                    | 55 ± 33                                                                    | 61 ± 35                                                                           |
| Right kidney volume (ml)             | 803 ± 733               | 1058 ± 700                                                                 | 1254 ± 1026                                                                | 1034 ± 942                                                                        |
| Left kidney volume (ml)              | 894 ± 832               | 1130 ± 773                                                                 | 1277 ± 993                                                                 | 1098 ± 915                                                                        |
| Total kidney volume (ml)             | 1697 ± 1538             | 2188 ± 1433                                                                | 2531 ± 2000                                                                | 2132 ± 1841                                                                       |
| MCIC (1A-1B-1B-1C-1D-1E)             | 9 - 42 - 48 - 33 - 8    | 0 - 2 - 3 - 4 - 1                                                          | 0 - 7 - 4 - 9 - 2                                                          | 2 - 15 - 20 - 14 - 2                                                              |
| Total liver volume (ml)              | 2316 ± 1209             | 2512 ± 1585                                                                | 2512 ± 1585                                                                | 2512 ± 1585                                                                       |

mTKV, measured total kidney volume; eTKV, estimated total kidney volume; eGFR, estimated glomerular filtration rate; MCIC, Mayo Clinic Imaging Classification.

**Supplementary Table 2. Mayo Clinic Imaging Classification according to mTKV vs eTKV in the total cohort (n=140)**

|                        |    | MCIC according to eTKV |    |    |    |    |
|------------------------|----|------------------------|----|----|----|----|
| N=140                  |    | 1A                     | 1B | 1C | 1D | 1E |
| MCIC according to mTKV | 1A | 8                      | 1  |    |    |    |
|                        | 1B | 6                      | 36 |    |    |    |
|                        | 1C |                        | 8  | 39 | 1  |    |
|                        | 1D |                        |    | 4  | 29 |    |
|                        | 1E |                        |    |    | 1  | 7  |
